# Supplementary material
Source: PubMed Central journal article supplement (PMC1201579)

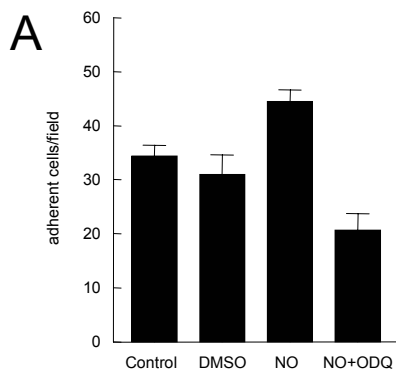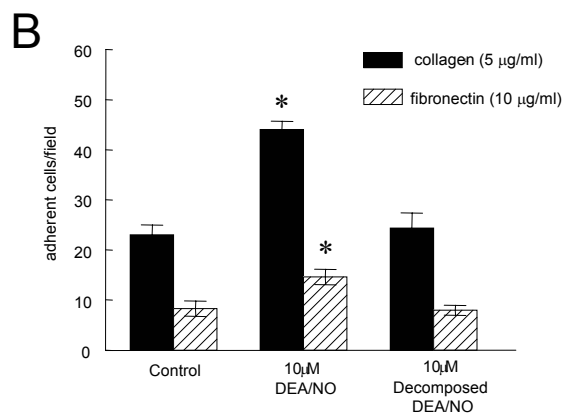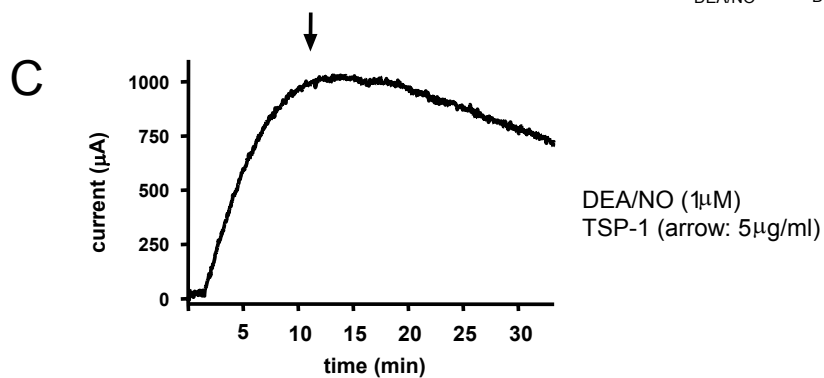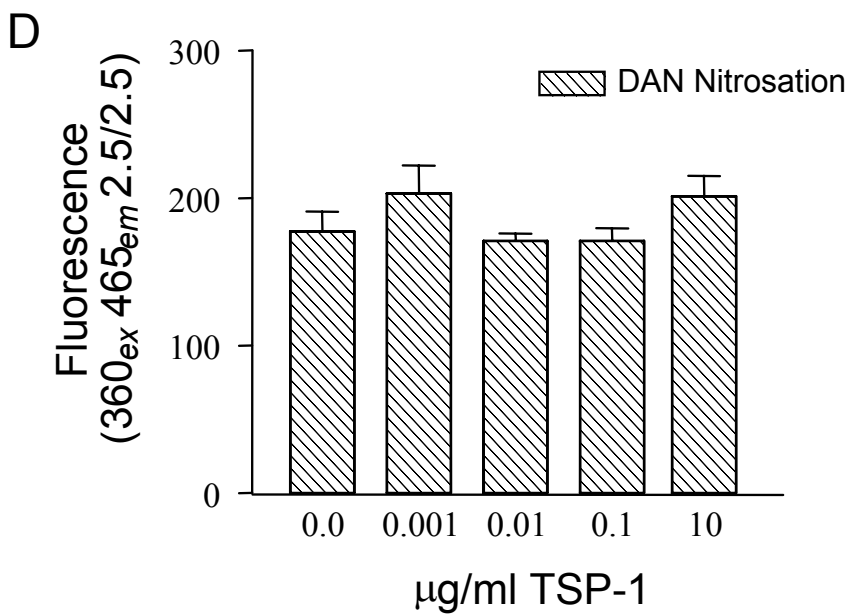

Supplement: pnas_0502977102_1.pdf [file pnas_0502977102_1.pdf]

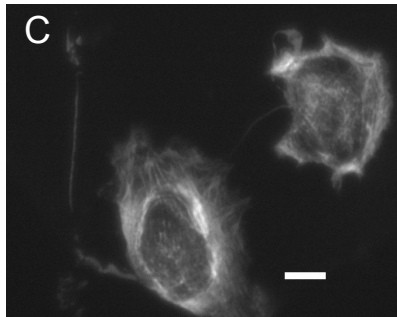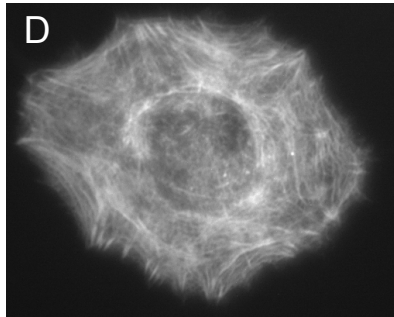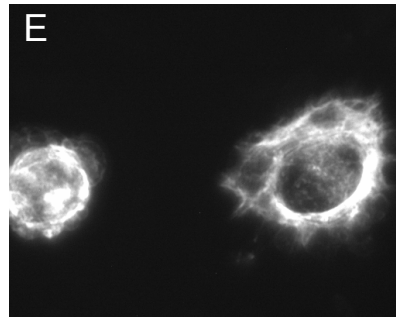

Supplement: pnas_0502977102_2.pdf [file pnas_0502977102_2.pdf]

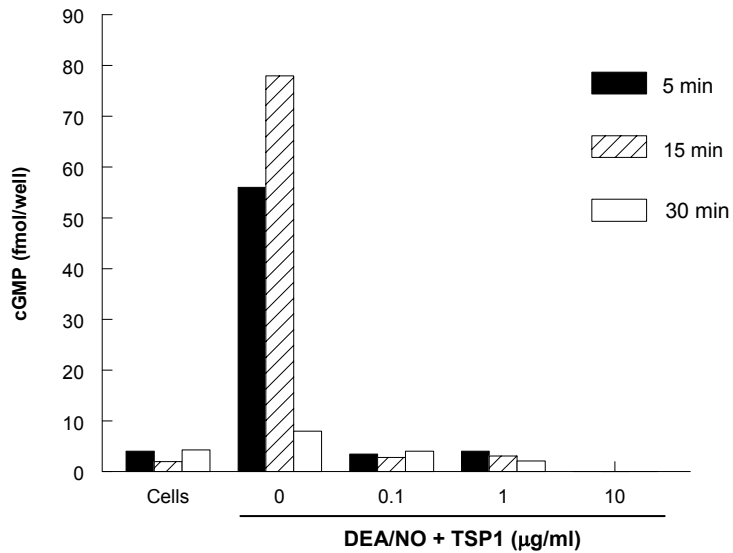

Supplement: pnas_0502977102_3.pdf [file pnas_0502977102_3.pdf]
